# Supplementary material
Source: Research Square preprint supplement (doi:10.21203/rs.3.rs-9703955/v1)
Supplement: Supplementary file 1 [file 2c4f31f6ab40ca8fa98b6379.xlsx]

## Sheet: M-MAMA
agegrp	parity	marital	income	education	occupation	resident	distance	aware_m_mama	seen_advert	advert_source	number_reachable	obsteneoermgcyavailable	utilization	vehicle	arrange	times	reasons	facility_name
26-36	3-4	Married	Low Income	Primary	Farmer	Village	4-6 Km	No	Yes	Community	No	Yes	Utilise M-Mama	M-Mama Ambulance	TBA	Once	Free Service	Bitale
15-25	1-2	Married	Low Income	Primary	Housewife	Village	4-6 Km	No	No	Not Sure	No	Yes	Not Utilise M-Mama	Private Transport	Healthcare Provider	Once	Not Aware of M-Mama	Bubango
15-25	1-2	Single	Low Income	Primary	Tailor	Village	4-6 Km	Yes	Yes	Not Sure	Yes	Yes	Not Utilise M-Mama	Private Transport	Relative	Once	Emergency Circumstances	Chankambwimba
15-25	1-2	Married	High Income	Primary	Employed	Town	0-3 Km	No	No	Not Sure	I don't Know	No	Not Utilise M-Mama	Private Transport	Healthcare Provider	Once	Not Aware of M-Mama	Kagongo
26-36	3-4	Married	Low Income	None	Farmer	Town	4-6 Km	No	Yes	Not Sure	No	No	Not Utilise M-Mama	Private Transport	Relative	Once	Emergency Circumstances	Kagunga
15-25	1-2	Married	Low Income	Primary	Tailor	Village	4-6 Km	Yes	No	Community	I don't Know	No	Not Utilise M-Mama	Private Transport	Relative	Once	Emergency Circumstances	Kalalangabo
26-36	1-2	Single	Low Income	None	Housewife	Town	0-3 Km	No	Yes	RCH	Yes	Yes	Not Utilise M-Mama	Private Transport	Healthcare Provider	Once	Emergency Circumstances	Kamara
26-36	3-4	Married	Low Income	Primary	Employed	Village	4-6 Km	No	No	Not Sure	No	No	Not Utilise M-Mama	Private Transport	Relative	Once	Emergency Circumstances	Kaseke
15-25	1-2	Married	Low Income	None	Farmer	Village	4-6 Km	Yes	Yes	RCH	Yes	Yes	Utilise M-Mama	M-Mama Ambulance	Healthcare Provider	Once	Free Service	Kidahwe
15-25	3-4	Married	High Income	Secondary+	Tailor	Town	0-3 Km	No	No	Not Sure	Yes	No	Not Utilise M-Mama	Private Transport	Healthcare Provider	Once	Not Aware of M-Mama	Kiganza
26-36	3-4	Married	Low Income	None	Farmer	Village	4-6 Km	No	Yes	RCH	No	Yes	Not Utilise M-Mama	Private Transport	Relative	Once	Emergency Circumstances	Kimbwela
15-25	1-2	Married	Low Income	Primary	Housewife	Village	4-6 Km	Yes	No	Not Sure	I don't Know	Yes	Utilise M-Mama	M-Mama Community Tax	Healthcare Provider	Once	Quick Response	Mahembe
26-36	3-4	Married	Low Income	Primary	Farmer	Village	4-6 Km	No	Yes	Not Sure	No	Yes	Utilise M-Mama	M-Mama Community Tax	Healthcare Provider	Once	Free Service	Matendo
26-36	3-4	Single	Low Income	Primary	Farmer	Village	4-6 Km	No	No	Community	I don't Know	No	Not Utilise M-Mama	Private Transport	Healthcare Provider	Once	Not Aware of M-Mama	Matyazo
15-25	1-2	Married	Low Income	None	Farmer	Village	4-6 Km	Yes	No	RCH	Yes	No	Utilise M-Mama	M-Mama Ambulance	Healthcare Provider	Once	Free Service	Mgaranganza
15-25	3-4	Married	High Income	Secondary+	Housewife	Village	4-6 Km	No	No	Not Sure	I don't Know	No	Not Utilise M-Mama	Private Transport	Healthcare Provider	Once	Not Aware of M-Mama	Mkongoro
15-25	3-4	Married	Low Income	None	Farmer	Village	0-3 Km	No	Yes	Community	Yes	Yes	Not Utilise M-Mama	Private Transport	TBA	Once	Emergency Circumstances	Mwamgongo
15-25	1-2	Married	High Income	Primary	Tailor	Village	4-6 Km	Yes	No	Not Sure	Yes	No	Utilise M-Mama	M-Mama Ambulance	Healthcare Provider	Twice	Free Service	Nkungwe
26-36	1-2	Married	High Income	Secondary+	Employed	Town	0-3 Km	No	Yes	RCH	No	No	Not Utilise M-Mama	Private Transport	Relative	Once	Free Service	Nyamhoza
26-36	1-2	Married	Low Income	Primary	Farmer	Village	0-3 Km	No	No	Not Sure	No	No	Not Utilise M-Mama	Private Transport	Relative	Once	Emergency Circumstances	Pamila
15-25	1-2	Single	Low Income	None	Housewife	Town	0-3 Km	Yes	Yes	RCH	No	No	Utilise M-Mama	M-Mama Community Tax	Healthcare Provider	Once	Quick Response	Chankele
15-25	3-4	Married	High Income	Primary	Employed	Village	4-6 Km	No	No	Community	I don't Know	No	Utilise M-Mama	M-Mama Ambulance	Healthcare Provider	Once	Free Service	Bitale
26-36	3-4	Married	Low Income	Primary	Housewife	Town	0-3 Km	No	Yes	RCH	Yes	Yes	Not Utilise M-Mama	Private Transport	Healthcare Provider	Once	Emergency Circumstances	Bubango
15-25	1-2	Married	High Income	None	Housewife	Village	4-6 Km	Yes	No	Not Sure	Yes	No	Not Utilise M-Mama	Private Transport	Relative	Once	Emergency Circumstances	Chankambwimba
26-36	1-2	Married	Low Income	None	Farmer	Village	4-6 Km	No	Yes	Community	No	Yes	Utilise M-Mama	M-Mama Ambulance	Healthcare Provider	Once	Free Service	Kagongo
26-36	3-4	Married	Low Income	Primary	Farmer	Village	4-6 Km	No	No	Community	I don't Know	No	Not Utilise M-Mama	Private Transport	Relative	Once	Not Aware of M-Mama	Kagunga
15-25	1-2	Married	Low Income	None	Farmer	Village	4-6 Km	Yes	Yes	RCH	No	No	Utilise M-Mama	M-Mama Ambulance	Relative	Once	Quick Response	Kalalangabo
15-25	3-4	Single	High Income	Secondary+	Farmer	Village	0-3 Km	No	No	Not Sure	I don't Know	No	Not Utilise M-Mama	Private Transport	Relative	Twice	Emergency Circumstances	Kamara
26-36	3-4	Married	Low Income	Primary	Farmer	Village	4-6 Km	No	Yes	Not Sure	Yes	Yes	Not Utilise M-Mama	Private Transport	TBA	Once	Emergency Circumstances	Kaseke
15-25	1-2	Married	High Income	Secondary+	Tailor	Town	4-6 Km	Yes	No	Not Sure	I don't Know	Yes	Not Utilise M-Mama	Private Transport	Healthcare Provider	Twice	Emergency Circumstances	Kidahwe
26-36	1-2	Married	Low Income	None	Farmer	Village	0-3 Km	No	Yes	RCH	Yes	Yes	Not Utilise M-Mama	Private Transport	TBA	Twice	Emergency Circumstances	Kiganza
15-25	3-4	Married	Low Income	Primary	Farmer	Village	4-6 Km	No	No	Not Sure	No	No	Not Utilise M-Mama	Private Transport	Relative	Once	Emergency Circumstances	Kimbwela
15-25	1-2	Married	Low Income	None	Housewife	Town	0-3 Km	Yes	No	RCH	No	No	Utilise M-Mama	M-Mama Ambulance	Healthcare Provider	Once	Quick Response	Mahembe
15-25	3-4	Married	Low Income	Secondary+	Tailor	Village	4-6 Km	No	No	Community	Yes	No	Utilise M-Mama	M-Mama Community Tax	Healthcare Provider	Once	Free Service	Matendo
26-36	1-2	Single	Low Income	None	Farmer	Village	4-6 Km	No	Yes	Community	Yes	Yes	Not Utilise M-Mama	Private Transport	Healthcare Provider	Once	Emergency Circumstances	Matyazo
15-25	1-2	Married	High Income	Secondary+	Housewife	Village	4-6 Km	Yes	No	RCH	I don't Know	No	Utilise M-Mama	M-Mama Ambulance	Healthcare Provider	Once	Quick Response	Mgaranganza
26-36	3-4	Married	Low Income	None	Tailor	Village	4-6 Km	No	Yes	Not Sure	No	Yes	Not Utilise M-Mama	Private Transport	Healthcare Provider	Once	Emergency Circumstances	Mkongoro
26-36	3-4	Married	Low Income	Primary	Farmer	Village	4-6 Km	No	No	Not Sure	I don't Know	No	Not Utilise M-Mama	Private Transport	Healthcare Provider	Once	Emergency Circumstances	Mwamgongo
15-25	1-2	Married	Low Income	None	Farmer	Village	4-6 Km	Yes	Yes	RCH	Yes	Yes	Utilise M-Mama	M-Mama Community Tax	TBA	Once	Free Service	Nkungwe
15-25	1-2	Married	High Income	Primary	Tailor	Town	0-3 Km	No	No	Not Sure	No	No	Utilise M-Mama	M-Mama Community Tax	Relative	Once	Quick Response	Nyamhoza
15-25	1-2	Married	Low Income	None	Farmer	Village	4-6 Km	No	No	RCH	No	No	Not Utilise M-Mama	Private Transport	Healthcare Provider	Once	Emergency Circumstances	Pamila
15-25	1-2	Single	High Income	Primary	Tailor	Town	4-6 Km	Yes	No	Not Sure	I don't Know	No	Utilise M-Mama	M-Mama Ambulance	Healthcare Provider	Once	Free Service	Chankele
26-36	1-2	Married	Low Income	None	Farmer	Village	0-3 Km	No	No	Not Sure	I don't Know	No	Not Utilise M-Mama	Private Transport	Relative	Once	Emergency Circumstances	Bitale
26-36	3-4	Married	High Income	Primary	Farmer	Village	4-6 Km	No	No	Not Sure	No	No	Not Utilise M-Mama	Private Transport	Relative	Once	Not Aware of M-Mama	Bubango
26-36	1-2	Married	Low Income	None	Farmer	Village	4-6 Km	Yes	Yes	RCH	Yes	Yes	Utilise M-Mama	M-Mama Ambulance	Healthcare Provider	Once	Free Service	Chankambwimba
15-25	3-4	Married	High Income	Secondary+	Employed	Town	0-3 Km	No	No	Community	No	Yes	Utilise M-Mama	M-Mama Ambulance	Healthcare Provider	Once	Free Service	Kagongo
26-36	3-4	Married	Low Income	None	Farmer	Village	0-3 Km	No	Yes	RCH	Yes	Yes	Not Utilise M-Mama	Private Transport	TBA	Once	Emergency Circumstances	Kagunga
15-25	1-2	Married	High Income	Primary	Housewife	Village	4-6 Km	Yes	No	RCH	I don't Know	No	Not Utilise M-Mama	Private Transport	Relative	Twice	Emergency Circumstances	Kalalangabo
26-36	1-2	Single	High Income	None	Farmer	Village	4-6 Km	No	No	Not Sure	No	No	Not Utilise M-Mama	Private Transport	Healthcare Provider	Once	Emergency Circumstances	Kamara
26-36	1-2	Married	High Income	Primary	Farmer	Village	0-3 Km	No	No	Not Sure	I don't Know	No	Not Utilise M-Mama	Private Transport	TBA	Once	Emergency Circumstances	Kaseke
15-25	1-2	Married	Low Income	Secondary+	Employed	Town	0-3 Km	Yes	Yes	RCH	I don't Know	Yes	Utilise M-Mama	M-Mama Ambulance	Healthcare Provider	Once	Free Service	Kidahwe
15-25	3-4	Married	High Income	Primary	Housewife	Village	4-6 Km	No	No	Not Sure	No	No	Not Utilise M-Mama	Private Transport	Relative	Once	Not Aware of M-Mama	Kiganza
26-36	3-4	Single	Low Income	Primary	Employed	Village	0-3 Km	No	Yes	Not Sure	Yes	Yes	Not Utilise M-Mama	Private Transport	Relative	Once	Emergency Circumstances	Kimbwela
15-25	1-2	Married	High Income	None	Farmer	Village	4-6 Km	Yes	No	Community	No	No	Utilise M-Mama	M-Mama Ambulance	Healthcare Provider	Once	Quick Response	Mahembe
26-36	3-4	Married	Low Income	None	Farmer	Village	0-3 Km	No	No	RCH	Yes	No	Utilise M-Mama	M-Mama Ambulance	Healthcare Provider	Once	Quick Response	Matendo
15-25	3-4	Single	Low Income	None	Farmer	Village	4-6 Km	No	No	Community	I don't Know	Yes	Not Utilise M-Mama	Private Transport	Healthcare Provider	Once	Not Aware of M-Mama	Matyazo
15-25	1-2	Married	Low Income	None	Farmer	Village	4-6 Km	Yes	Yes	RCH	No	Yes	Utilise M-Mama	M-Mama Community Tax	Healthcare Provider	Once	Quick Response	Mgaranganza
15-25	1-2	Married	High Income	Primary	Tailor	Town	0-3 Km	No	No	Not Sure	No	No	Not Utilise M-Mama	Private Transport	Relative	Twice	Not Aware of M-Mama	Mkongoro
26-36	3-4	Married	Low Income	Primary	Farmer	Village	4-6 Km	No	No	Not Sure	I don't Know	No	Not Utilise M-Mama	Private Transport	Healthcare Provider	Once	Emergency Circumstances	Mwamgongo
15-25	1-2	Married	High Income	None	Housewife	Village	4-6 Km	No	No	RCH	I don't Know	No	Utilise M-Mama	M-Mama Ambulance	Healthcare Provider	Once	Free Service	Nkungwe
26-36	1-2	Married	Low Income	None	Tailor	Town	0-3 Km	No	Yes	Not Sure	Yes	Yes	Not Utilise M-Mama	Private Transport	TBA	Once	Emergency Circumstances	Nyamhoza
26-36	1-2	Married	Low Income	Primary	Farmer	Village	4-6 Km	No	No	Community	I don't Know	No	Not Utilise M-Mama	Private Transport	Healthcare Provider	Once	Not Aware of M-Mama	Pamila
15-25	1-2	Single	Low Income	None	Farmer	Village	4-6 Km	Yes	Yes	RCH	No	No	Utilise M-Mama	M-Mama Ambulance	Healthcare Provider	Once	Quick Response	Chankele
15-25	3-4	Married	High Income	Secondary+	Tailor	Town	4-6 Km	No	No	Not Sure	No	No	Not Utilise M-Mama	Private Transport	Relative	Once	Not Aware of M-Mama	Bitale
15-25	3-4	Married	Low Income	Primary	Farmer	Village	4-6 Km	No	Yes	Not Sure	I don't Know	No	Not Utilise M-Mama	Private Transport	Healthcare Provider	Twice	Emergency Circumstances	Bubango
15-25	1-2	Married	High Income	Secondary+	Tailor	Village	4-6 Km	Yes	No	Community	I don't Know	No	Utilise M-Mama	M-Mama Community Tax	Healthcare Provider	Once	Free Service	Chankambwimba
26-36	3-4	Married	Low Income	Primary	Farmer	Village	4-6 Km	No	Yes	RCH	Yes	No	Utilise M-Mama	M-Mama Community Tax	TBA	Once	Free Service	Kagongo
26-36	3-4	Married	Low Income	Primary	Farmer	Village	4-6 Km	No	No	Not Sure	No	Yes	Not Utilise M-Mama	Private Transport	Relative	Once	Emergency Circumstances	Kagunga
15-25	1-2	Married	Low Income	None	Tailor	Town	0-3 Km	Yes	No	RCH	I don't Know	No	Utilise M-Mama	M-Mama Ambulance	Healthcare Provider	Once	Quick Response	Kalalangabo
15-25	3-4	Single	High Income	Secondary+	Employed	Town	0-3 Km	No	No	Not Sure	No	No	Not Utilise M-Mama	Private Transport	Relative	Once	Not Aware of M-Mama	Kamara
26-36	1-2	Married	Low Income	None	Tailor	Village	0-3 Km	No	Yes	RCH	No	Yes	Not Utilise M-Mama	Private Transport	TBA	Once	Emergency Circumstances	Kaseke
26-36	1-2	Married	High Income	Primary	Housewife	Village	4-6 Km	Yes	No	RCH	I don't Know	No	Not Utilise M-Mama	Private Transport	Relative	Once	Emergency Circumstances	Kidahwe
26-36	3-4	Married	Low Income	None	Tailor	Town	0-3 Km	No	No	Not Sure	Yes	No	Not Utilise M-Mama	Private Transport	Healthcare Provider	Once	Emergency Circumstances	Kiganza
15-25	3-4	Married	Low Income	Primary	Farmer	Village	4-6 Km	No	No	Community	I don't Know	No	Not Utilise M-Mama	Private Transport	Healthcare Provider	Once	Not Aware of M-Mama	Kimbwela
15-25	1-2	Married	Low Income	None	Farmer	Village	4-6 Km	Yes	Yes	Not Sure	Yes	No	Utilise M-Mama	M-Mama Community Tax	TBA	Twice	Free Service	Mahembe
15-25	1-2	Married	High Income	Secondary+	Employed	Village	4-6 Km	No	No	Not Sure	Yes	Yes	Utilise M-Mama	M-Mama Ambulance	Healthcare Provider	Twice	Quick Response	Matendo
26-36	3-4	Single	Low Income	None	Farmer	Town	0-3 Km	No	Yes	RCH	I don't Know	Yes	Utilise M-Mama	M-Mama Community Tax	Healthcare Provider	Twice	Free Service	Matyazo
15-25	1-2	Married	High Income	Primary	Tailor	Village	4-6 Km	Yes	No	Community	Yes	No	Utilise M-Mama	M-Mama Ambulance	Healthcare Provider	Once	Free Service	Mgaranganza
26-36	1-2	Married	Low Income	None	Housewife	Town	4-6 Km	No	No	Not Sure	No	No	Not Utilise M-Mama	Private Transport	Relative	Once	Emergency Circumstances	Mkongoro
26-36	3-4	Married	Low Income	None	Farmer	Village	4-6 Km	No	No	Not Sure	I don't Know	No	Not Utilise M-Mama	Private Transport	Healthcare Provider	Once	Emergency Circumstances	Mwamgongo
15-25	1-2	Married	Low Income	None	Farmer	Village	4-6 Km	Yes	Yes	RCH	I don't Know	Yes	Utilise M-Mama	M-Mama Ambulance	Healthcare Provider	Once	Quick Response	Nkungwe
15-25	3-4	Married	Low Income	Secondary+	Farmer	Village	4-6 Km	No	No	Community	No	No	Not Utilise M-Mama	Private Transport	TBA	Once	Not Aware of M-Mama	Nyamhoza
26-36	3-4	Married	Low Income	None	Tailor	Town	0-3 Km	No	Yes	RCH	Yes	Yes	Not Utilise M-Mama	Private Transport	TBA	Twice	Emergency Circumstances	Pamila
15-25	1-2	Single	High Income	Primary	Housewife	Village	4-6 Km	Yes	No	Not Sure	I don't Know	No	Not Utilise M-Mama	Private Transport	Relative	Once	Emergency Circumstances	Chankele
26-36	1-2	Married	Low Income	None	Tailor	Town	0-3 Km	No	No	RCH	No	Yes	Not Utilise M-Mama	Private Transport	Healthcare Provider	Once	Emergency Circumstances	Bitale
26-36	3-4	Married	High Income	Primary	Farmer	Village	4-6 Km	No	No	Not Sure	I don't Know	No	Not Utilise M-Mama	Private Transport	Healthcare Provider	Once	Not Aware of M-Mama	Bubango
15-25	1-2	Married	Low Income	None	Farmer	Village	4-6 Km	Yes	Yes	RCH	Yes	Yes	Utilise M-Mama	M-Mama Ambulance	Relative	Once	Free Service	Chankambwimba
15-25	1-2	Married	Low Income	Primary	Housewife	Town	0-3 Km	No	No	Not Sure	I don't Know	No	Utilise M-Mama	M-Mama Community Tax	Relative	Once	Free Service	Kagongo
15-25	3-4	Married	Low Income	Primary	Farmer	Village	4-6 Km	No	Yes	Not Sure	No	Yes	Not Utilise M-Mama	Private Transport	Healthcare Provider	Once	Emergency Circumstances	Kagunga
15-25	1-2	Married	High Income	None	Housewife	Village	4-6 Km	Yes	No	Not Sure	Yes	No	Utilise M-Mama	M-Mama Ambulance	Healthcare Provider	Once	Free Service	Kalalangabo
26-36	3-4	Single	Low Income	None	Farmer	Village	4-6 Km	No	Yes	Not Sure	Yes	Yes	Utilise M-Mama	M-Mama Ambulance	Healthcare Provider	Once	Quick Response	Kamara
26-36	3-4	Married	High Income	Primary	Employed	Town	0-3 Km	No	No	RCH	No	No	Not Utilise M-Mama	Private Transport	Relative	Once	Not Aware of M-Mama	Kaseke
15-25	1-2	Married	Low Income	None	Farmer	Town	0-3 Km	Yes	Yes	RCH	I don't Know	No	Utilise M-Mama	M-Mama Community Tax	Healthcare Provider	Once	Quick Response	Kidahwe
15-25	3-4	Married	Low Income	Secondary+	Tailor	Town	4-6 Km	No	No	Community	No	No	Not Utilise M-Mama	Private Transport	Relative	Once	Not Aware of M-Mama	Kiganza
26-36	3-4	Married	Low Income	Primary	Tailor	Village	0-3 Km	No	Yes	RCH	Yes	Yes	Not Utilise M-Mama	Private Transport	Healthcare Provider	Once	Emergency Circumstances	Kimbwela
15-25	1-2	Married	High Income	None	Housewife	Village	4-6 Km	Yes	No	Community	No	No	Utilise M-Mama	M-Mama Ambulance	Healthcare Provider	Twice	Quick Response	Mahembe
26-36	3-4	Married	Low Income	None	Tailor	Town	0-3 Km	No	No	Not Sure	I don't Know	No	Not Utilise M-Mama	Private Transport	Relative	Once	Emergency Circumstances	Matendo
15-25	3-4	Single	High Income	Primary	Farmer	Village	4-6 Km	No	No	Not Sure	I don't Know	No	Not Utilise M-Mama	Private Transport	Healthcare Provider	Once	Emergency Circumstances	Matyazo
26-36	1-2	Married	Low Income	None	Employed	Village	4-6 Km	Yes	No	RCH	No	No	Utilise M-Mama	M-Mama Ambulance	TBA	Once	Free Service	Mgaranganza
15-25	1-2	Married	High Income	Primary	Tailor	Town	0-3 Km	No	No	RCH	I don't Know	Yes	Not Utilise M-Mama	Private Transport	Relative	Once	Not Aware of M-Mama	Mkongoro
26-36	1-2	Married	Low Income	None	Farmer	Town	0-3 Km	No	Yes	Not Sure	Yes	Yes	Not Utilise M-Mama	Private Transport	TBA	Twice	Emergency Circumstances	Mwamgongo
15-25	1-2	Married	High Income	None	Tailor	Village	4-6 Km	Yes	No	Community	I don't Know	No	Utilise M-Mama	M-Mama Community Tax	Healthcare Provider	Once	Free Service	Nkungwe
15-25	3-4	Married	High Income	None	Employed	Town	0-3 Km	No	Yes	Community	Yes	Yes	Utilise M-Mama	M-Mama Ambulance	Healthcare Provider	Once	Quick Response	Nyamhoza
26-36	1-2	Married	Low Income	Primary	Farmer	Village	4-6 Km	No	No	RCH	I don't Know	No	Not Utilise M-Mama	Private Transport	TBA	Once	Not Aware of M-Mama	Pamila
15-25	1-2	Single	High Income	None	Farmer	Town	0-3 Km	Yes	Yes	Not Sure	I don't Know	Yes	Utilise M-Mama	M-Mama Ambulance	Healthcare Provider	Twice	Free Service	Chankele
26-36	3-4	Married	High Income	Secondary+	Farmer	Village	4-6 Km	No	No	Not Sure	No	No	Not Utilise M-Mama	Private Transport	Relative	Once	Not Aware of M-Mama	Bitale
26-36	1-2	Married	Low Income	None	Farmer	Town	0-3 Km	No	Yes	RCH	No	No	Not Utilise M-Mama	Private Transport	TBA	Once	Emergency Circumstances	Bubango
15-25	1-2	Married	High Income	Primary	Housewife	Town	4-6 Km	Yes	No	Not Sure	I don't Know	Yes	Not Utilise M-Mama	Private Transport	Relative	Once	Emergency Circumstances	Chankambwimba
15-25	3-4	Married	High Income	None	Farmer	Town	0-3 Km	No	Yes	Not Sure	I don't Know	No	Not Utilise M-Mama	Private Transport	Healthcare Provider	Once	Emergency Circumstances	Kagongo
26-36	1-2	Married	Low Income	Primary	Farmer	Village	4-6 Km	No	No	Community	No	No	Not Utilise M-Mama	Private Transport	Healthcare Provider	Once	Not Aware of M-Mama	Kagunga
26-36	1-2	Married	Low Income	None	Farmer	Village	4-6 Km	Yes	Yes	RCH	Yes	Yes	Utilise M-Mama	M-Mama Community Tax	TBA	Once	Quick Response	Kalalangabo
15-25	3-4	Single	High Income	Secondary+	Employed	Town	0-3 Km	No	No	Not Sure	I don't Know	No	Not Utilise M-Mama	Private Transport	Relative	Once	Not Aware of M-Mama	Kamara
15-25	1-2	Married	Low Income	None	Farmer	Village	0-3 Km	No	Yes	RCH	No	Yes	Not Utilise M-Mama	Private Transport	Healthcare Provider	Once	Emergency Circumstances	Kaseke
15-25	1-2	Married	High Income	None	Tailor	Village	4-6 Km	Yes	No	Community	I don't Know	No	Utilise M-Mama	M-Mama Ambulance	Healthcare Provider	Once	Quick Response	Kidahwe
15-25	3-4	Married	Low Income	Primary	Housewife	Town	0-3 Km	No	Yes	RCH	Yes	Yes	Not Utilise M-Mama	Private Transport	Healthcare Provider	Twice	Emergency Circumstances	Kiganza
15-25	1-2	Married	High Income	None	Farmer	Village	4-6 Km	No	No	RCH	I don't Know	No	Not Utilise M-Mama	Private Transport	TBA	Once	Emergency Circumstances	Kimbwela
15-25	1-2	Married	Low Income	None	Farmer	Town	0-3 Km	Yes	No	Not Sure	Yes	No	Utilise M-Mama	M-Mama Ambulance	Healthcare Provider	Once	Free Service	Mahembe
26-36	3-4	Married	High Income	Secondary+	Tailor	Town	0-3 Km	No	No	Community	Yes	No	Not Utilise M-Mama	Private Transport	Relative	Once	Not Aware of M-Mama	Matendo
26-36	3-4	Single	Low Income	Primary	Farmer	Town	0-3 Km	No	Yes	RCH	No	No	Not Utilise M-Mama	Private Transport	Relative	Once	Emergency Circumstances	Matyazo
15-25	1-2	Married	Low Income	None	Farmer	Village	4-6 Km	Yes	No	Not Sure	I don't Know	Yes	Utilise M-Mama	M-Mama Community Tax	Healthcare Provider	Twice	Free Service	Mgaranganza
15-25	3-4	Married	Low Income	None	Farmer	Village	0-3 Km	No	Yes	Not Sure	No	Yes	Utilise M-Mama	M-Mama Community Tax	Healthcare Provider	Once	Free Service	Mkongoro
15-25	3-4	Married	High Income	Primary	Employed	Town	0-3 Km	No	No	Community	I don't Know	No	Not Utilise M-Mama	Private Transport	Relative	Once	Not Aware of M-Mama	Mwamgongo
15-25	1-2	Married	Low Income	None	Farmer	Town	4-6 Km	Yes	Yes	RCH	Yes	No	Not Utilise M-Mama	Private Transport	TBA	Once	Emergency Circumstances	Nkungwe
15-25	1-2	Married	High Income	Secondary+	Employed	Town	0-3 Km	No	No	Not Sure	No	No	Not Utilise M-Mama	Private Transport	Relative	Once	Not Aware of M-Mama	Nyamhoza
26-36	3-4	Married	Low Income	None	Farmer	Town	0-3 Km	No	Yes	RCH	I don't Know	No	Not Utilise M-Mama	Private Transport	Healthcare Provider	Once	Emergency Circumstances	Pamila
15-25	1-2	Single	High Income	Primary	Tailor	Village	4-6 Km	Yes	No	Community	Yes	No	Utilise M-Mama	M-Mama Ambulance	Healthcare Provider	Once	Quick Response	Chankele
26-36	3-4	Married	Low Income	None	Tailor	Town	4-6 Km	No	Yes	Not Sure	No	Yes	Not Utilise M-Mama	Private Transport	TBA	Once	Emergency Circumstances	Bitale
26-36	1-2	Married	Low Income	Primary	Farmer	Village	4-6 Km	No	No	Not Sure	Yes	No	Not Utilise M-Mama	Private Transport	Relative	Once	Not Aware of M-Mama	Bubango
15-25	1-2	Single	Low Income	None	Farmer	Village	4-6 Km	Yes	No	Not Sure	I don't Know	No	Utilise M-Mama	M-Mama Community Tax	Healthcare Provider	Once	Free Service	Chankambwimba
15-25	3-4	Married	Low Income	Primary	Farmer	Village	4-6 Km	No	No	Not Sure	I don't Know	No	Not Utilise M-Mama	Private Transport	TBA	Once	Not Aware of M-Mama	Kagongo
26-36	1-2	Married	Low Income	None	Farmer	Town	4-6 Km	No	Yes	RCH	Yes	Yes	Not Utilise M-Mama	Private Transport	TBA	Once	Emergency Circumstances	Kagunga
15-25	1-2	Married	High Income	None	Housewife	Village	4-6 Km	Yes	No	Not Sure	I don't Know	Yes	Utilise M-Mama	M-Mama Ambulance	Healthcare Provider	Twice	Quick Response	Kalalangabo
15-25	3-4	Single	Low Income	Primary	Tailor	Town	0-3 Km	No	Yes	RCH	Yes	Yes	Not Utilise M-Mama	Private Transport	Relative	Once	Emergency Circumstances	Kamara
26-36	1-2	Married	High Income	Primary	Farmer	Village	4-6 Km	No	No	Not Sure	I don't Know	No	Not Utilise M-Mama	Private Transport	Relative	Once	Emergency Circumstances	Kaseke
15-25	1-2	Married	Low Income	None	Farmer	Village	4-6 Km	Yes	Yes	RCH	Yes	Yes	Utilise M-Mama	M-Mama Ambulance	Healthcare Provider	Once	Free Service	Kidahwe
26-36	3-4	Married	High Income	Secondary+	Employed	Town	0-3 Km	No	No	Not Sure	Yes	No	Not Utilise M-Mama	Private Transport	Healthcare Provider	Once	Not Aware of M-Mama	Kiganza
26-36	1-2	Married	Low Income	Primary	Farmer	Town	0-3 Km	No	Yes	RCH	Yes	Yes	Not Utilise M-Mama	Private Transport	Healthcare Provider	Once	Emergency Circumstances	Kimbwela
15-25	1-2	Married	High Income	None	Tailor	Village	4-6 Km	Yes	No	Community	No	No	Utilise M-Mama	M-Mama Community Tax	Healthcare Provider	Once	Quick Response	Mahembe
15-25	3-4	Married	Low Income	Primary	Tailor	Town	4-6 Km	No	Yes	RCH	No	Yes	Not Utilise M-Mama	Private Transport	TBA	Once	Emergency Circumstances	Matendo
26-36	3-4	Single	High Income	Primary	Farmer	Village	0-3 Km	No	No	Not Sure	I don't Know	No	Not Utilise M-Mama	Private Transport	Relative	Once	Not Aware of M-Mama	Matyazo
15-25	1-2	Married	Low Income	None	Farmer	Village	4-6 Km	Yes	Yes	RCH	Yes	No	Utilise M-Mama	M-Mama Ambulance	Healthcare Provider	Once	Free Service	Mgaranganza
15-25	3-4	Married	Low Income	None	Farmer	Village	4-6 Km	No	No	Community	I don't Know	No	Not Utilise M-Mama	Private Transport	Healthcare Provider	Once	Not Aware of M-Mama	Mkongoro
15-25	1-2	Married	Low Income	None	Farmer	Town	0-3 Km	No	No	RCH	I don't Know	No	Not Utilise M-Mama	Private Transport	TBA	Once	Emergency Circumstances	Mwamgongo
15-25	1-2	Married	High Income	Primary	Housewife	Village	4-6 Km	Yes	No	Community	I don't Know	No	Not Utilise M-Mama	Private Transport	Relative	Once	Emergency Circumstances	Nkungwe
15-25	3-4	Married	Low Income	None	Farmer	Town	0-3 Km	No	Yes	Not Sure	Yes	Yes	Utilise M-Mama	M-Mama Ambulance	Healthcare Provider	Once	Free Service	Nyamhoza
26-36	1-2	Married	Low Income	Primary	Farmer	Village	4-6 Km	No	No	Not Sure	I don't Know	No	Not Utilise M-Mama	Private Transport	Healthcare Provider	Once	Emergency Circumstances	Pamila
15-25	1-2	Single	Low Income	None	Farmer	Village	4-6 Km	Yes	Yes	Not Sure	No	Yes	Utilise M-Mama	M-Mama Community Tax	Healthcare Provider	Once	Quick Response	Chankele
15-25	1-2	Married	High Income	Secondary+	Employed	Town	0-3 Km	No	No	RCH	I don't Know	No	Not Utilise M-Mama	Private Transport	Relative	Twice	Not Aware of M-Mama	Bitale
26-36	1-2	Married	Low Income	None	Farmer	Village	0-3 Km	No	Yes	RCH	Yes	Yes	Not Utilise M-Mama	Private Transport	Healthcare Provider	Once	Emergency Circumstances	Bubango
15-25	1-2	Married	High Income	Primary	Tailor	Town	4-6 Km	No	No	Community	Yes	Yes	Utilise M-Mama	M-Mama Ambulance	Healthcare Provider	Once	Quick Response	Chankambwimba
26-36	3-4	Married	Low Income	Primary	Farmer	Village	4-6 Km	No	Yes	Community	Yes	Yes	Not Utilise M-Mama	Private Transport	TBA	Once	Emergency Circumstances	Kagongo
15-25	3-4	Married	High Income	Primary	Farmer	Village	4-6 Km	No	No	Community	No	No	Not Utilise M-Mama	Private Transport	Relative	Once	Not Aware of M-Mama	Kagunga
15-25	1-2	Married	Low Income	None	Farmer	Village	4-6 Km	Yes	No	Not Sure	I don't Know	No	Utilise M-Mama	M-Mama Ambulance	Healthcare Provider	Twice	Free Service	Kalalangabo
15-25	3-4	Single	High Income	Secondary+	Employed	Town	4-6 Km	No	No	Not Sure	I don't Know	No	Not Utilise M-Mama	Private Transport	Relative	Once	Not Aware of M-Mama	Kamara
26-36	1-2	Married	Low Income	Primary	Farmer	Town	0-3 Km	No	Yes	RCH	No	No	Not Utilise M-Mama	Private Transport	TBA	Once	Emergency Circumstances	Kaseke
15-25	1-2	Married	High Income	None	Housewife	Village	4-6 Km	Yes	No	Not Sure	I don't Know	No	Utilise M-Mama	M-Mama Community Tax	Relative	Once	Quick Response	Kidahwe
15-25	3-4	Married	Low Income	None	Tailor	Village	4-6 Km	No	Yes	RCH	Yes	Yes	Not Utilise M-Mama	Private Transport	Healthcare Provider	Once	Emergency Circumstances	Kiganza
26-36	3-4	Married	Low Income	Primary	Farmer	Village	4-6 Km	No	No	Community	Yes	Yes	Not Utilise M-Mama	Private Transport	TBA	Once	Emergency Circumstances	Kimbwela
15-25	1-2	Married	Low Income	None	Farmer	Village	4-6 Km	Yes	Yes	RCH	Yes	Yes	Utilise M-Mama	M-Mama Ambulance	Healthcare Provider	Twice	Free Service	Mahembe
15-25	3-4	Married	High Income	Secondary+	Employed	Town	4-6 Km	No	No	Not Sure	I don't Know	No	Not Utilise M-Mama	Private Transport	Relative	Once	Not Aware of M-Mama	Matendo
15-25	1-2	Single	Low Income	None	Farmer	Town	0-3 Km	No	Yes	Not Sure	I don't Know	Yes	Not Utilise M-Mama	Private Transport	Relative	Once	Emergency Circumstances	Matyazo
15-25	1-2	Married	High Income	Primary	Tailor	Village	4-6 Km	Yes	No	Community	I don't Know	No	Utilise M-Mama	M-Mama Ambulance	Healthcare Provider	Once	Free Service	Mgaranganza
26-36	3-4	Married	Low Income	None	Tailor	Town	0-3 Km	No	No	RCH	Yes	No	Utilise M-Mama	M-Mama Community Tax	Healthcare Provider	Once	Free Service	Mkongoro
26-36	3-4	Married	Low Income	Primary	Farmer	Village	4-6 Km	No	No	Not Sure	Yes	No	Not Utilise M-Mama	Private Transport	Relative	Once	Not Aware of M-Mama	Mwamgongo
15-25	1-2	Married	Low Income	None	Housewife	Town	0-3 Km	Yes	Yes	Not Sure	Yes	No	Not Utilise M-Mama	Private Transport	Relative	Once	Not Aware of M-Mama	Nkungwe
15-25	3-4	Married	High Income	Secondary+	Employed	Town	4-6 Km	No	No	Community	No	No	Not Utilise M-Mama	Private Transport	Healthcare Provider	Once	Not Aware of M-Mama	Nyamhoza
26-36	1-2	Married	Low Income	None	Farmer	Town	0-3 Km	No	Yes	RCH	Yes	Yes	Not Utilise M-Mama	Private Transport	TBA	Once	Emergency Circumstances	Pamila
15-25	1-2	Single	High Income	Primary	Housewife	Village	4-6 Km	Yes	No	Not Sure	I don't Know	No	Utilise M-Mama	M-Mama Ambulance	Healthcare Provider	Twice	Quick Response	Chankele
15-25	1-2	Married	Low Income	None	Farmer	Town	0-3 Km	No	Yes	RCH	Yes	Yes	Not Utilise M-Mama	Private Transport	Healthcare Provider	Twice	Emergency Circumstances	Bitale
26-36	1-2	Married	Low Income	Primary	Tailor	Village	4-6 Km	No	No	Community	Yes	No	Not Utilise M-Mama	Private Transport	Healthcare Provider	Once	Emergency Circumstances	Bubango
15-25	1-2	Married	Low Income	None	Farmer	Village	0-3 Km	Yes	No	Not Sure	Yes	No	Utilise M-Mama	M-Mama Ambulance	TBA	Once	Quick Response	Chankambwimba
26-36	3-4	Married	High Income	Secondary+	Housewife	Village	4-6 Km	No	No	Not Sure	I don't Know	No	Not Utilise M-Mama	Private Transport	Relative	Once	Not Aware of M-Mama	Kagongo
26-36	3-4	Married	Low Income	None	Farmer	Town	0-3 Km	No	Yes	RCH	No	Yes	Not Utilise M-Mama	Private Transport	TBA	Once	Emergency Circumstances	Kagunga
15-25	1-2	Married	High Income	Secondary+	Employed	Village	4-6 Km	Yes	No	Not Sure	I don't Know	No	Utilise M-Mama	M-Mama Community Tax	Healthcare Provider	Once	Free Service	Kalalangabo
15-25	3-4	Single	Low Income	Primary	Farmer	Village	4-6 Km	No	Yes	RCH	No	No	Not Utilise M-Mama	Private Transport	Relative	Once	Emergency Circumstances	Kamara
15-25	1-2	Married	High Income	None	Housewife	Village	0-3 Km	No	No	Not Sure	I don't Know	No	Not Utilise M-Mama	Private Transport	Relative	Once	Not Aware of M-Mama	Kaseke
15-25	1-2	Married	Low Income	None	Farmer	Town	0-3 Km	Yes	Yes	Not Sure	I don't Know	Yes	Utilise M-Mama	M-Mama Ambulance	Healthcare Provider	Once	Free Service	Kidahwe
15-25	3-4	Married	High Income	Secondary+	Employed	Town	4-6 Km	No	No	Community	Yes	No	Not Utilise M-Mama	Private Transport	Healthcare Provider	Once	Not Aware of M-Mama	Kiganza
26-36	1-2	Married	Low Income	None	Farmer	Town	4-6 Km	No	Yes	RCH	I don't Know	Yes	Not Utilise M-Mama	Private Transport	TBA	Once	Emergency Circumstances	Kimbwela
15-25	1-2	Married	High Income	Primary	Housewife	Village	4-6 Km	Yes	No	Not Sure	No	Yes	Utilise M-Mama	M-Mama Ambulance	Healthcare Provider	Once	Quick Response	Mahembe
15-25	3-4	Married	High Income	None	Farmer	Town	0-3 Km	No	Yes	RCH	Yes	Yes	Utilise M-Mama	M-Mama Ambulance	Healthcare Provider	Once	Free Service	Matendo
26-36	1-2	Single	Low Income	Primary	Tailor	Village	4-6 Km	No	No	Not Sure	I don't Know	No	Not Utilise M-Mama	Private Transport	Relative	Once	Not Aware of M-Mama	Matyazo
15-25	1-2	Married	Low Income	None	Farmer	Village	4-6 Km	Yes	No	RCH	Yes	No	Not Utilise M-Mama	Private Transport	TBA	Once	Emergency Circumstances	Mgaranganza
26-36	3-4	Married	High Income	Secondary+	Tailor	Town	0-3 Km	No	No	Not Sure	Yes	No	Not Utilise M-Mama	Private Transport	Relative	Once	Not Aware of M-Mama	Mkongoro
15-25	3-4	Married	Low Income	None	Farmer	Village	4-6 Km	No	Yes	RCH	Yes	Yes	Not Utilise M-Mama	Private Transport	Relative	Once	Emergency Circumstances	Mwamgongo
15-25	1-2	Married	High Income	Primary	Tailor	Town	4-6 Km	Yes	No	Community	I don't Know	No	Utilise M-Mama	M-Mama Ambulance	Healthcare Provider	Twice	Quick Response	Nkungwe
15-25	3-4	Married	Low Income	None	Farmer	Village	0-3 Km	No	Yes	RCH	No	Yes	Not Utilise M-Mama	Private Transport	TBA	Once	Emergency Circumstances	Nyamhoza
26-36	1-2	Married	Low Income	Primary	Tailor	Village	0-3 Km	No	No	Not Sure	I don't Know	No	Not Utilise M-Mama	Private Transport	Relative	Once	Emergency Circumstances	Pamila
15-25	1-2	Single	Low Income	None	Farmer	Village	4-6 Km	Yes	Yes	Community	No	Yes	Utilise M-Mama	M-Mama Ambulance	Relative	Once	Free Service	Chankele
15-25	3-4	Married	Low Income	Primary	Tailor	Village	4-6 Km	No	No	Community	I don't Know	No	Not Utilise M-Mama	Private Transport	Healthcare Provider	Once	Not Aware of M-Mama	Bitale
26-36	1-2	Married	Low Income	None	Farmer	Village	4-6 Km	No	Yes	RCH	No	No	Not Utilise M-Mama	Private Transport	TBA	Once	Emergency Circumstances	Bubango
15-25	1-2	Married	High Income	None	Farmer	Village	4-6 Km	Yes	No	Not Sure	Yes	No	Utilise M-Mama	M-Mama Community Tax	Healthcare Provider	Twice	Quick Response	Chankambwimba
15-25	3-4	Married	High Income	None	Farmer	Village	4-6 Km	No	Yes	RCH	I don't Know	Yes	Utilise M-Mama	M-Mama Ambulance	Relative	Once	Quick Response	Kagongo
26-36	1-2	Married	Low Income	Primary	Tailor	Village	4-6 Km	No	No	Community	No	No	Not Utilise M-Mama	Private Transport	Relative	Once	Not Aware of M-Mama	Kagunga
15-25	1-2	Married	Low Income	None	Farmer	Town	0-3 Km	Yes	Yes	Not Sure	No	No	Not Utilise M-Mama	Private Transport	TBA	Once	Emergency Circumstances	Kalalangabo
15-25	3-4	Single	High Income	Secondary+	Employed	Town	0-3 Km	No	No	Not Sure	No	No	Not Utilise M-Mama	Private Transport	TBA	Once	Not Aware of M-Mama	Kamara
26-36	1-2	Married	Low Income	None	Farmer	Town	4-6 Km	No	Yes	Not Sure	Yes	Yes	Not Utilise M-Mama	Private Transport	Relative	Once	Emergency Circumstances	Kaseke
15-25	1-2	Married	Low Income	Primary	Farmer	Village	4-6 Km	Yes	No	Community	I don't Know	No	Utilise M-Mama	M-Mama Ambulance	Healthcare Provider	Twice	Free Service	Kidahwe
26-36	1-2	Married	Low Income	None	Farmer	Village	4-6 Km	No	No	RCH	Yes	No	Not Utilise M-Mama	Private Transport	Healthcare Provider	Once	Emergency Circumstances	Kiganza
15-25	3-4	Married	Low Income	Primary	Housewife	Village	4-6 Km	No	No	Community	I don't Know	No	Not Utilise M-Mama	Private Transport	Relative	Once	Emergency Circumstances	Kimbwela
26-36	1-2	Married	Low Income	None	Farmer	Town	0-3 Km	Yes	Yes	Not Sure	No	Yes	Utilise M-Mama	M-Mama Community Tax	Healthcare Provider	Once	Free Service	Mahembe
26-36	1-2	Married	High Income	None	Tailor	Village	4-6 Km	No	No	Community	I don't Know	No	Not Utilise M-Mama	Private Transport	Relative	Once	Not Aware of M-Mama	Matendo
15-25	3-4	Single	Low Income	None	Farmer	Town	0-3 Km	No	Yes	Not Sure	No	Yes	Not Utilise M-Mama	Private Transport	TBA	Once	Emergency Circumstances	Matyazo
26-36	1-2	Married	High Income	Primary	Housewife	Town	4-6 Km	Yes	No	RCH	I don't Know	No	Utilise M-Mama	M-Mama Ambulance	Healthcare Provider	Once	Quick Response	Mgaranganza
26-36	1-2	Married	Low Income	None	Farmer	Village	0-3 Km	No	Yes	Not Sure	No	Yes	Not Utilise M-Mama	Private Transport	Healthcare Provider	Once	Emergency Circumstances	Mkongoro
15-25	3-4	Married	Low Income	Primary	Tailor	Village	4-6 Km	No	No	Not Sure	Yes	No	Not Utilise M-Mama	Private Transport	Healthcare Provider	Once	Emergency Circumstances	Mwamgongo
26-36	1-2	Married	Low Income	None	Farmer	Village	4-6 Km	Yes	Yes	RCH	I don't Know	Yes	Utilise M-Mama	M-Mama Ambulance	TBA	Twice	Free Service	Nkungwe
26-36	1-2	Married	High Income	Secondary+	Employed	Town	0-3 Km	No	No	Not Sure	No	No	Not Utilise M-Mama	Private Transport	TBA	Once	Not Aware of M-Mama	Nyamhoza
15-25	3-4	Married	Low Income	Primary	Farmer	Town	0-3 Km	No	Yes	RCH	No	Yes	Not Utilise M-Mama	Private Transport	Relative	Once	Emergency Circumstances	Pamila
26-36	1-2	Single	Low Income	None	Tailor	Village	4-6 Km	Yes	No	Community	Yes	No	Utilise M-Mama	M-Mama Community Tax	Healthcare Provider	Once	Quick Response	Chankele
26-36	1-2	Married	Low Income	None	Farmer	Town	0-3 Km	No	Yes	Community	No	Yes	Not Utilise M-Mama	Private Transport	TBA	Once	Emergency Circumstances	Bitale
15-25	3-4	Married	Low Income	Primary	Farmer	Village	4-6 Km	No	No	RCH	No	No	Utilise M-Mama	M-Mama Ambulance	Healthcare Provider	Once	Free Service	Bubango
26-36	1-2	Married	Low Income	None	Farmer	Town	4-6 Km	Yes	Yes	Not Sure	Yes	Yes	Utilise M-Mama	M-Mama Ambulance	Relative	Once	Free Service	Chankambwimba
26-36	1-2	Single	Low Income	Primary	Farmer	Village	4-6 Km	No	No	Community	I don't Know	No	Not Utilise M-Mama	Private Transport	Relative	Once	Not Aware of M-Mama	Kagongo
15-25	3-4	Married	Low Income	None	Tailor	Town	0-3 Km	No	Yes	RCH	Yes	Yes	Not Utilise M-Mama	Private Transport	Healthcare Provider	Once	Emergency Circumstances	Kagunga
26-36	1-2	Married	High Income	Secondary+	Farmer	Village	4-6 Km	Yes	No	Not Sure	I don't Know	No	Utilise M-Mama	M-Mama Ambulance	Healthcare Provider	Twice	Quick Response	Kalalangabo
15-25	1-2	Single	Low Income	None	Farmer	Town	0-3 Km	No	Yes	RCH	No	Yes	Not Utilise M-Mama	Private Transport	Relative	Once	Emergency Circumstances	Kamara
15-25	3-4	Married	Low Income	Primary	Farmer	Village	4-6 Km	No	No	Community	I don't Know	No	Not Utilise M-Mama	Private Transport	Relative	Once	Emergency Circumstances	Kaseke
26-36	1-2	Married	Low Income	None	Tailor	Town	0-3 Km	Yes	Yes	Not Sure	I don't Know	Yes	Utilise M-Mama	M-Mama Community Tax	TBA	Once	Quick Response	Kidahwe
26-36	1-2	Single	High Income	Secondary+	Employed	Town	0-3 Km	No	No	Not Sure	Yes	No	Not Utilise M-Mama	Private Transport	Healthcare Provider	Once	Not Aware of M-Mama	Kiganza
15-25	3-4	Married	Low Income	None	Farmer	Town	0-3 Km	No	Yes	Not Sure	No	Yes	Not Utilise M-Mama	Private Transport	Relative	Twice	Emergency Circumstances	Kimbwela
26-36	1-2	Married	High Income	Primary	Tailor	Town	4-6 Km	Yes	No	Not Sure	No	No	Utilise M-Mama	M-Mama Ambulance	Healthcare Provider	Once	Free Service	Mahembe
15-25	1-2	Married	Low Income	None	Farmer	Village	0-3 Km	No	Yes	RCH	No	No	Not Utilise M-Mama	Private Transport	TBA	Once	Emergency Circumstances	Matendo
15-25	3-4	Single	Low Income	Primary	Farmer	Village	4-6 Km	No	No	RCH	No	No	Not Utilise M-Mama	Private Transport	Relative	Once	Emergency Circumstances	Matyazo
26-36	1-2	Married	Low Income	None	Farmer	Town	0-3 Km	Yes	Yes	Not Sure	I don't Know	Yes	Utilise M-Mama	M-Mama Ambulance	Healthcare Provider	Once	Quick Response	Mgaranganza
26-36	1-2	Married	Low Income	Primary	Tailor	Village	4-6 Km	No	No	Community	I don't Know	No	Not Utilise M-Mama	Private Transport	Healthcare Provider	Once	Not Aware of M-Mama	Mkongoro
15-25	3-4	Single	Low Income	None	Farmer	Town	0-3 Km	No	Yes	RCH	Yes	Yes	Not Utilise M-Mama	Private Transport	TBA	Once	Emergency Circumstances	Mwamgongo
26-36	1-2	Married	High Income	Secondary+	Farmer	Village	4-6 Km	Yes	No	Community	I don't Know	No	Not Utilise M-Mama	Private Transport	Relative	Once	Emergency Circumstances	Nkungwe
15-25	1-2	Married	Low Income	None	Farmer	Town	4-6 Km	No	Yes	Not Sure	Yes	Yes	Not Utilise M-Mama	Private Transport	Relative	Once	Emergency Circumstances	Nyamhoza
15-25	3-4	Married	Low Income	Primary	Farmer	Village	4-6 Km	No	No	Not Sure	I don't Know	No	Not Utilise M-Mama	Private Transport	Healthcare Provider	Once	Not Aware of M-Mama	Pamila
26-36	1-2	Single	Low Income	None	Tailor	Village	4-6 Km	Yes	Yes	Not Sure	No	Yes	Utilise M-Mama	M-Mama Ambulance	Healthcare Provider	Once	Free Service	Chankele
26-36	1-2	Married	High Income	Secondary+	Employed	Town	0-3 Km	No	No	RCH	I don't Know	No	Not Utilise M-Mama	Private Transport	Relative	Once	Not Aware of M-Mama	Bitale
15-25	3-4	Married	Low Income	None	Farmer	Town	0-3 Km	No	No	Not Sure	No	Yes	Not Utilise M-Mama	Private Transport	Relative	Once	Emergency Circumstances	Bubango
26-36	1-2	Married	High Income	Secondary+	Tailor	Village	4-6 Km	Yes	No	Community	Yes	No	Utilise M-Mama	M-Mama Ambulance	Healthcare Provider	Once	Quick Response	Chankambwimba
26-36	1-2	Married	Low Income	None	Farmer	Village	4-6 Km	No	Yes	Community	No	Yes	Not Utilise M-Mama	Private Transport	TBA	Once	Emergency Circumstances	Kagongo
15-25	3-4	Married	Low Income	None	Farmer	Town	4-6 Km	No	No	Not Sure	No	No	Not Utilise M-Mama	Private Transport	Relative	Once	Emergency Circumstances	Kagunga
26-36	1-2	Married	Low Income	None	Tailor	Village	4-6 Km	Yes	Yes	RCH	I don't Know	Yes	Utilise M-Mama	M-Mama Community Tax	Healthcare Provider	Once	Quick Response	Kalalangabo
26-36	1-2	Single	Low Income	Primary	Farmer	Village	4-6 Km	No	No	Community	No	No	Not Utilise M-Mama	Private Transport	Relative	Once	Not Aware of M-Mama	Kamara
15-25	3-4	Married	Low Income	None	Farmer	Village	4-6 Km	No	No	Not Sure	No	No	Utilise M-Mama	M-Mama Ambulance	TBA	Once	Quick Response	Kaseke
26-36	1-2	Married	Low Income	None	Housewife	Village	4-6 Km	Yes	No	Not Sure	I don't Know	No	Utilise M-Mama	M-Mama Ambulance	Healthcare Provider	Twice	Free Service	Kidahwe
26-36	1-2	Married	Low Income	None	Farmer	Town	0-3 Km	No	Yes	Not Sure	Yes	No	Not Utilise M-Mama	Private Transport	Healthcare Provider	Once	Emergency Circumstances	Kiganza
15-25	3-4	Married	Low Income	Primary	Farmer	Village	4-6 Km	No	No	Community	I don't Know	No	Not Utilise M-Mama	Private Transport	Relative	Once	Not Aware of M-Mama	Kimbwela
26-36	1-2	Married	Low Income	None	Tailor	Town	0-3 Km	Yes	Yes	RCH	Yes	No	Utilise M-Mama	M-Mama Ambulance	Healthcare Provider	Once	Quick Response	Mahembe
26-36	1-2	Married	High Income	Secondary+	Employed	Town	0-3 Km	No	No	Not Sure	I don't Know	No	Not Utilise M-Mama	Private Transport	Healthcare Provider	Once	Not Aware of M-Mama	Matendo
15-25	3-4	Single	Low Income	None	Farmer	Village	0-3 Km	No	Yes	Not Sure	No	Yes	Not Utilise M-Mama	Private Transport	Relative	Once	Emergency Circumstances	Matyazo
26-36	1-2	Married	High Income	Primary	Tailor	Village	4-6 Km	Yes	No	Not Sure	I don't Know	No	Utilise M-Mama	M-Mama Community Tax	Healthcare Provider	Once	Free Service	Mgaranganza
26-36	1-2	Married	Low Income	None	Farmer	Town	0-3 Km	No	Yes	RCH	No	Yes	Not Utilise M-Mama	Private Transport	Relative	Once	Emergency Circumstances	Mkongoro
15-25	3-4	Married	Low Income	Primary	Farmer	Town	4-6 Km	No	No	RCH	Yes	No	Not Utilise M-Mama	Private Transport	Relative	Once	Emergency Circumstances	Mwamgongo
26-36	1-2	Married	High Income	None	Tailor	Town	0-3 Km	Yes	Yes	RCH	Yes	Yes	Utilise M-Mama	M-Mama Ambulance	Healthcare Provider	Twice	Quick Response	Nkungwe
15-25	1-2	Married	Low Income	Primary	Housewife	Village	4-6 Km	No	No	Community	No	No	Not Utilise M-Mama	Private Transport	TBA	Once	Not Aware of M-Mama	Nyamhoza
15-25	3-4	Married	Low Income	None	Farmer	Town	0-3 Km	No	Yes	RCH	No	Yes	Not Utilise M-Mama	Private Transport	Relative	Once	Emergency Circumstances	Pamila
26-36	1-2	Single	High Income	None	Housewife	Village	4-6 Km	Yes	No	Not Sure	I don't Know	Yes	Utilise M-Mama	M-Mama Ambulance	Relative	Once	Free Service	Chankele
15-25	1-2	Married	Low Income	None	Farmer	Village	4-6 Km	No	No	Community	I don't Know	No	Not Utilise M-Mama	Private Transport	Healthcare Provider	Once	Emergency Circumstances	Bitale
15-25	3-4	Married	High Income	Primary	Tailor	Village	0-3 Km	No	No	Not Sure	No	No	Not Utilise M-Mama	Private Transport	Healthcare Provider	Once	Not Aware of M-Mama	Bubango
26-36	1-2	Married	Low Income	None	Farmer	Village	4-6 Km	Yes	Yes	RCH	Yes	Yes	Utilise M-Mama	M-Mama Community Tax	TBA	Once	Free Service	Chankambwimba
15-25	1-2	Married	High Income	Primary	Housewife	Village	4-6 Km	No	No	Not Sure	I don't Know	No	Not Utilise M-Mama	Private Transport	Relative	Once	Not Aware of M-Mama	Kagongo
15-25	3-4	Married	Low Income	None	Farmer	Village	0-3 Km	No	Yes	Not Sure	Yes	Yes	Utilise M-Mama	M-Mama Community Tax	Healthcare Provider	Once	Free Service	Kagunga
26-36	1-2	Married	High Income	None	Farmer	Village	4-6 Km	Yes	No	Not Sure	I don't Know	No	Utilise M-Mama	M-Mama Ambulance	Healthcare Provider	Twice	Quick Response	Kalalangabo
15-25	1-2	Single	Low Income	None	Farmer	Town	0-3 Km	No	Yes	RCH	No	Yes	Not Utilise M-Mama	Private Transport	Relative	Once	Emergency Circumstances	Kamara
15-25	3-4	Married	Low Income	Primary	Housewife	Town	4-6 Km	No	No	Not Sure	I don't Know	No	Not Utilise M-Mama	Private Transport	Healthcare Provider	Once	Emergency Circumstances	Kaseke
26-36	1-2	Married	Low Income	None	Farmer	Village	4-6 Km	Yes	Yes	RCH	I don't Know	No	Utilise M-Mama	M-Mama Ambulance	Healthcare Provider	Once	Quick Response	Kidahwe
15-25	1-2	Married	Low Income	Secondary+	Tailor	Village	4-6 Km	No	No	Community	Yes	No	Not Utilise M-Mama	Private Transport	Healthcare Provider	Once	Not Aware of M-Mama	Kiganza
15-25	3-4	Married	Low Income	None	Farmer	Town	0-3 Km	No	Yes	Not Sure	I don't Know	Yes	Not Utilise M-Mama	Private Transport	Healthcare Provider	Once	Emergency Circumstances	Kimbwela
26-36	1-2	Married	High Income	None	Housewife	Village	4-6 Km	Yes	No	RCH	No	No	Not Utilise M-Mama	Private Transport	Relative	Twice	Emergency Circumstances	Mahembe
15-25	1-2	Married	Low Income	None	Farmer	Town	0-3 Km	No	Yes	Community	Yes	Yes	Not Utilise M-Mama	Private Transport	Relative	Once	Emergency Circumstances	Matendo
15-25	3-4	Single	Low Income	Primary	Tailor	Town	4-6 Km	No	No	Community	No	No	Not Utilise M-Mama	Private Transport	Healthcare Provider	Once	Not Aware of M-Mama	Matyazo
26-36	1-2	Married	Low Income	None	Farmer	Village	4-6 Km	Yes	No	RCH	No	Yes	Utilise M-Mama	M-Mama Ambulance	Healthcare Provider	Once	Quick Response	Mgaranganza
15-25	1-2	Married	Low Income	Primary	Housewife	Village	4-6 Km	No	No	Not Sure	I don't Know	No	Not Utilise M-Mama	Private Transport	Relative	Once	Not Aware of M-Mama	Mkongoro
15-25	3-4	Married	Low Income	None	Farmer	Town	0-3 Km	No	Yes	Not Sure	Yes	Yes	Not Utilise M-Mama	Private Transport	Relative	Once	Emergency Circumstances	Mwamgongo
26-36	1-2	Married	High Income	None	Tailor	Village	4-6 Km	Yes	No	Community	I don't Know	No	Utilise M-Mama	M-Mama Ambulance	Healthcare Provider	Once	Free Service	Nkungwe
15-25	1-2	Married	Low Income	None	Farmer	Town	0-3 Km	No	Yes	RCH	No	No	Not Utilise M-Mama	Private Transport	TBA	Once	Emergency Circumstances	Nyamhoza
15-25	3-4	Married	Low Income	Primary	Housewife	Village	4-6 Km	No	No	Not Sure	I don't Know	No	Not Utilise M-Mama	Private Transport	Relative	Once	Emergency Circumstances	Pamila
26-36	1-2	Single	Low Income	None	Farmer	Town	0-3 Km	Yes	Yes	Community	I don't Know	Yes	Utilise M-Mama	M-Mama Community Tax	Healthcare Provider	Twice	Quick Response	Chankele
15-25	1-2	Married	Low Income	Primary	Tailor	Village	4-6 Km	No	No	Community	I don't Know	No	Not Utilise M-Mama	Private Transport	Relative	Once	Not Aware of M-Mama	Bitale
15-25	1-2	Married	Low Income	None	Farmer	Town	0-3 Km	No	Yes	Not Sure	I don't Know	Yes	Not Utilise M-Mama	Private Transport	TBA	Once	Emergency Circumstances	Bubango
26-36	1-2	Married	High Income	None	Housewife	Village	4-6 Km	Yes	No	RCH	Yes	No	Utilise M-Mama	M-Mama Ambulance	Healthcare Provider	Once	Free Service	Chankambwimba
15-25	1-2	Married	Low Income	None	Farmer	Town	0-3 Km	No	Yes	Not Sure	Yes	Yes	Not Utilise M-Mama	Private Transport	TBA	Once	Emergency Circumstances	Kagongo
15-25	3-4	Married	Low Income	Primary	Farmer	Village	4-6 Km	No	No	Not Sure	No	No	Utilise M-Mama	M-Mama Ambulance	Healthcare Provider	Once	Quick Response	Kagunga
26-36	1-2	Married	Low Income	None	Farmer	Village	4-6 Km	Yes	No	Not Sure	No	No	Utilise M-Mama	M-Mama Ambulance	Relative	Once	Free Service	Kalalangabo
15-25	1-2	Single	High Income	Secondary+	Employed	Town	0-3 Km	No	No	RCH	No	No	Not Utilise M-Mama	Private Transport	Relative	Once	Not Aware of M-Mama	Kamara
15-25	3-4	Married	Low Income	None	Farmer	Town	0-3 Km	No	Yes	RCH	Yes	Yes	Not Utilise M-Mama	Private Transport	Healthcare Provider	Once	Emergency Circumstances	Kaseke
26-36	1-2	Married	High Income	None	Tailor	Town	4-6 Km	Yes	No	Not Sure	I don't Know	No	Utilise M-Mama	M-Mama Community Tax	Healthcare Provider	Twice	Quick Response	Kidahwe
15-25	1-2	Married	Low Income	None	Housewife	Town	0-3 Km	No	Yes	Not Sure	Yes	Yes	Not Utilise M-Mama	Private Transport	Relative	Once	Emergency Circumstances	Kiganza
15-25	3-4	Married	Low Income	Primary	Farmer	Village	4-6 Km	No	No	Not Sure	I don't Know	Yes	Not Utilise M-Mama	Private Transport	Relative	Once	Emergency Circumstances	Kimbwela
26-36	1-2	Married	Low Income	None	Farmer	Village	0-3 Km	Yes	Yes	Not Sure	No	Yes	Not Utilise M-Mama	Private Transport	Healthcare Provider	Once	Emergency Circumstances	Mahembe
15-25	1-2	Married	Low Income	Primary	Employed	Town	4-6 Km	No	No	Community	Yes	No	Not Utilise M-Mama	Private Transport	Healthcare Provider	Once	Not Aware of M-Mama	Matendo
15-25	3-4	Single	High Income	None	Employed	Town	0-3 Km	No	Yes	RCH	I don't Know	No	Not Utilise M-Mama	Private Transport	TBA	Once	Emergency Circumstances	Matyazo
26-36	1-2	Single	Low Income	None	Housewife	Village	4-6 Km	Yes	No	Community	I don't Know	No	Utilise M-Mama	M-Mama Ambulance	Relative	Twice	Free Service	Mgaranganza
15-25	1-2	Married	Low Income	None	Farmer	Town	0-3 Km	No	Yes	Not Sure	Yes	Yes	Not Utilise M-Mama	Private Transport	Relative	Once	Emergency Circumstances	Mkongoro
15-25	3-4	Married	Low Income	Primary	Tailor	Village	4-6 Km	No	No	Community	Yes	No	Not Utilise M-Mama	Private Transport	TBA	Once	Emergency Circumstances	Mwamgongo
26-36	1-2	Married	Low Income	None	Farmer	Village	4-6 Km	Yes	Yes	RCH	No	No	Utilise M-Mama	M-Mama Community Tax	Healthcare Provider	Once	Quick Response	Nkungwe
15-25	1-2	Married	Low Income	Secondary+	Housewife	Village	4-6 Km	No	No	Not Sure	No	No	Not Utilise M-Mama	Private Transport	Relative	Once	Not Aware of M-Mama	Nyamhoza
15-25	3-4	Married	Low Income	None	Farmer	Town	0-3 Km	No	Yes	Not Sure	I don't Know	No	Not Utilise M-Mama	Private Transport	Healthcare Provider	Once	Emergency Circumstances	Pamila
26-36	1-2	Single	High Income	Primary	Tailor	Village	4-6 Km	Yes	No	Community	I don't Know	No	Utilise M-Mama	M-Mama Ambulance	Healthcare Provider	Once	Free Service	Chankele
15-25	1-2	Married	Low Income	None	Farmer	Town	0-3 Km	No	Yes	RCH	No	Yes	Not Utilise M-Mama	Private Transport	TBA	Once	Emergency Circumstances	Bitale
15-25	3-4	Married	Low Income	Primary	Tailor	Village	4-6 Km	No	No	RCH	No	No	Not Utilise M-Mama	Private Transport	Relative	Once	Not Aware of M-Mama	Bubango
26-36	1-2	Married	Low Income	None	Farmer	Town	4-6 Km	Yes	No	Not Sure	Yes	No	Utilise M-Mama	M-Mama Ambulance	Healthcare Provider	Once	Free Service	Chankambwimba
15-25	1-2	Married	Low Income	Primary	Tailor	Village	4-6 Km	No	No	Not Sure	I don't Know	No	Not Utilise M-Mama	Private Transport	Healthcare Provider	Once	Not Aware of M-Mama	Kagongo
15-25	3-4	Married	Low Income	None	Farmer	Town	0-3 Km	No	Yes	RCH	Yes	Yes	Not Utilise M-Mama	Private Transport	Relative	Once	Emergency Circumstances	Kagunga
26-36	1-2	Married	High Income	None	Farmer	Village	4-6 Km	Yes	No	RCH	I don't Know	Yes	Utilise M-Mama	M-Mama Community Tax	Healthcare Provider	Once	Quick Response	Kalalangabo
15-25	1-2	Single	High Income	None	Farmer	Town	0-3 Km	No	Yes	Not Sure	No	Yes	Not Utilise M-Mama	Private Transport	Relative	Once	Emergency Circumstances	Kamara
15-25	3-4	Married	Low Income	Primary	Employed	Village	4-6 Km	No	No	Community	I don't Know	No	Utilise M-Mama	M-Mama Ambulance	Healthcare Provider	Once	Free Service	Kaseke
26-36	1-2	Married	Low Income	None	Farmer	Village	4-6 Km	Yes	Yes	RCH	Yes	Yes	Utilise M-Mama	M-Mama Ambulance	TBA	Twice	Free Service	Kidahwe
15-25	1-2	Married	Low Income	Secondary+	Farmer	Village	4-6 Km	No	No	Not Sure	Yes	No	Not Utilise M-Mama	Private Transport	Healthcare Provider	Once	Not Aware of M-Mama	Kiganza
15-25	3-4	Married	Low Income	None	Farmer	Town	0-3 Km	No	Yes	Not Sure	No	No	Not Utilise M-Mama	Private Transport	Relative	Once	Emergency Circumstances	Kimbwela
26-36	1-2	Married	High Income	Primary	Tailor	Village	4-6 Km	Yes	No	Not Sure	No	No	Utilise M-Mama	M-Mama Ambulance	Healthcare Provider	Once	Free Service	Mahembe
15-25	1-2	Married	Low Income	None	Farmer	Village	4-6 Km	No	No	RCH	No	No	Not Utilise M-Mama	Private Transport	Relative	Once	Emergency Circumstances	Matendo
15-25	3-4	Single	Low Income	Primary	Housewife	Town	4-6 Km	No	No	Community	No	No	Not Utilise M-Mama	Private Transport	Relative	Twice	Emergency Circumstances	Matyazo
26-36	1-2	Married	Low Income	None	Farmer	Village	4-6 Km	Yes	Yes	Not Sure	Yes	No	Not Utilise M-Mama	Private Transport	Relative	Once	Emergency Circumstances	Mgaranganza
15-25	1-2	Married	Low Income	Primary	Tailor	Village	4-6 Km	No	No	Not Sure	I don't Know	No	Not Utilise M-Mama	Private Transport	TBA	Once	Not Aware of M-Mama	Mkongoro
15-25	3-4	Married	Low Income	None	Farmer	Village	4-6 Km	No	Yes	RCH	Yes	Yes	Not Utilise M-Mama	Private Transport	TBA	Once	Emergency Circumstances	Mwamgongo
26-36	1-2	Married	High Income	None	Housewife	Village	4-6 Km	Yes	No	Not Sure	I don't Know	No	Utilise M-Mama	M-Mama Ambulance	Healthcare Provider	Once	Quick Response	Nkungwe
15-25	1-2	Married	Low Income	None	Farmer	Town	4-6 Km	No	Yes	RCH	No	Yes	Not Utilise M-Mama	Private Transport	Healthcare Provider	Once	Emergency Circumstances	Nyamhoza
15-25	3-4	Married	High Income	Primary	Tailor	Village	4-6 Km	No	No	Community	I don't Know	Yes	Not Utilise M-Mama	Private Transport	Relative	Once	Emergency Circumstances	Pamila
26-36	1-2	Single	Low Income	None	Farmer	Village	4-6 Km	Yes	No	RCH	Yes	No	Utilise M-Mama	M-Mama Ambulance	Relative	Twice	Free Service	Chankele
