# Supplementary material
Source: Research Square preprint supplement (doi:10.21203/rs.3.rs-9703955/v1)
Supplement: Supplementary file 1 [file 376a5a542f7da2df460815d2.pdf]

**S2 Table. QUESTIONNAIRE USED FOR DATA COLLECTION IN KIGOMA DISTRICT COUNCIL, TANZANIA, 2025. (ENGLISH VERSION) (√) Tick Answers**

| QN                                                                                                                                                                | QUESTIONS                                                                                                   | RESPONSE OPTIONS                                                                                                                                                                                                                           |
|-------------------------------------------------------------------------------------------------------------------------------------------------------------------|-------------------------------------------------------------------------------------------------------------|--------------------------------------------------------------------------------------------------------------------------------------------------------------------------------------------------------------------------------------------|
| <b>SECTION A: SOCIOECONOMIC, DEMOGRAPHIC CHARACTERISTICS AND FACTORS THAT INFLUENCE UTILISATION OF THE M-MAMA EMERGENCY TRANSPORT SYSTEM (<i>Objective 1</i>)</b> |                                                                                                             |                                                                                                                                                                                                                                            |
| 01                                                                                                                                                                | Age (years)                                                                                                 | <input type="checkbox"/> 15-25<br><input type="checkbox"/> 26-36<br><input type="checkbox"/> 37-47                                                                                                                                         |
| 02                                                                                                                                                                | Parity (Number of livebirth)                                                                                | <input type="checkbox"/> 1-2<br><input type="checkbox"/> 3-4<br><input type="checkbox"/> 5 or more                                                                                                                                         |
| 03                                                                                                                                                                | Marital Status                                                                                              | <input type="checkbox"/> Single<br><input type="checkbox"/> Married                                                                                                                                                                        |
| 04                                                                                                                                                                | Household Income Level                                                                                      | <input type="checkbox"/> Low Income<br><input type="checkbox"/> High Income                                                                                                                                                                |
| 05                                                                                                                                                                | Education Level                                                                                             | <input type="checkbox"/> None<br><input type="checkbox"/> Primary<br><input type="checkbox"/> Secondary and Above                                                                                                                          |
| 06                                                                                                                                                                | Occupation                                                                                                  | <input type="checkbox"/> Farmer<br><input type="checkbox"/> Housewife<br><input type="checkbox"/> Tailor<br><input type="checkbox"/> Employed<br><input type="checkbox"/> No Occupation<br><input type="checkbox"/> Other (specify): _____ |
| 07                                                                                                                                                                | Place of residence                                                                                          | <input type="checkbox"/> Town<br><input type="checkbox"/> Village                                                                                                                                                                          |
| 08                                                                                                                                                                | Distance to nearest RCH facility                                                                            | <input type="checkbox"/> 0-3 Km<br><input type="checkbox"/> 4-6 Km<br><input type="checkbox"/> More than 6 Km                                                                                                                              |
| <b>SECTION B: PROJECT ENABLING FACTORS THAT INFLUENCE THE UTILISATION OF M-MAMA EMERGENCY TRANSPORT SYSTEM (<i>Objective 2</i>)</b>                               |                                                                                                             |                                                                                                                                                                                                                                            |
| 09                                                                                                                                                                | Are you aware of the M-Mama Emergency Transport System?                                                     | <input type="checkbox"/> Yes<br><input type="checkbox"/> No                                                                                                                                                                                |
| 10                                                                                                                                                                | Have you ever seen advertisements of M-Mama EmTS?                                                           | <input type="checkbox"/> Yes<br><input type="checkbox"/> No<br><input type="checkbox"/> I don't Know                                                                                                                                       |
| 11                                                                                                                                                                | Where have you seen advertisements of M-Mama EmTS?                                                          | <input type="checkbox"/> Community<br><input type="checkbox"/> RCH<br><input type="checkbox"/> Not Sure<br><input type="checkbox"/> Other (specify): _____                                                                                 |
| 12                                                                                                                                                                | Is the obstetric and neonatal emergency care call center number of M-Mama easily reachable when at village? | <input type="checkbox"/> Yes<br><input type="checkbox"/> No<br><input type="checkbox"/> I don't Know                                                                                                                                       |
| 13                                                                                                                                                                | Is obstetric and neonatal emergency care readily available at primary health facility?                      | <input type="checkbox"/> Yes<br><input type="checkbox"/> No<br><input type="checkbox"/> I don't Know                                                                                                                                       |

**SECTION C: PROPORTION OF UTILISATION OF THE M-MAMA EMERGENCY TRANSPORT SYSTEM (Objective 3)**

|    |                                                                                |                                                                                                                                                                                                                                                                     |
|----|--------------------------------------------------------------------------------|---------------------------------------------------------------------------------------------------------------------------------------------------------------------------------------------------------------------------------------------------------------------|
| 14 | How did you utilise emergency transport service?                               | <input type="checkbox"/> Paid (Not Utilise-M-Mama)<br><input type="checkbox"/> Free (Utilise M-Mama)                                                                                                                                                                |
| 15 | What type of vehicle did you use during obstetric or newborn health emergency? | <input type="checkbox"/> Private Vehicle<br><input type="checkbox"/> M-Mama Ambulance<br><input type="checkbox"/> M-Mama Community Tax<br><input type="checkbox"/> Other (specify): _____                                                                           |
| 16 | How did you arrange emergency transport for referral?                          | <input type="checkbox"/> I arranged it myself<br><input type="checkbox"/> Relative<br><input type="checkbox"/> TBA<br><input type="checkbox"/> Healthcare Provider<br><input type="checkbox"/> Other (specify): _____                                               |
| 17 | How many times have you used the emergency transport for referral?             | <input type="checkbox"/> Once<br><input type="checkbox"/> Twice                                                                                                                                                                                                     |
| 18 | Why did you utilise or not utilise the M-Mama emergency transport?             | <input type="checkbox"/> Free Service<br><input type="checkbox"/> Emergency<br><input type="checkbox"/> Circumstances<br><input type="checkbox"/> Quick Response<br><input type="checkbox"/> Not Aware of M-Mama<br><input type="checkbox"/> Other (specify): _____ |
